# Supplementary material
Source: PubMed Central journal article supplement (PMC4049960)
Supplement: cc-13-1237-s01.pdf [file cc-13-1237-s01.pdf]

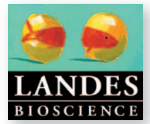

## **Supplemental Material to:**

**Jia Liu, Xianhui Yin, Baohua Liu, Huiling Zheng,  
Guangqian Zhou, Liyun Gong, Meng Li, Xueqin Li,  
Youya Wang, Jingyi Hu, Vaidehi Krishnan, Zhongjun Zhou,  
and Zimei Wang**

**HP1 $\alpha$  mediates defective heterochromatin repair and  
accelerates senescence in Zmpste24-deficient cells**

**Cell Cycle 2014; 13(8)**

**<http://dx.doi.org/10.4161/cc.28105>**

**<http://www.landesbioscience.com/journals/cc/article/28105>**

## Supporting Information

### Figure S1

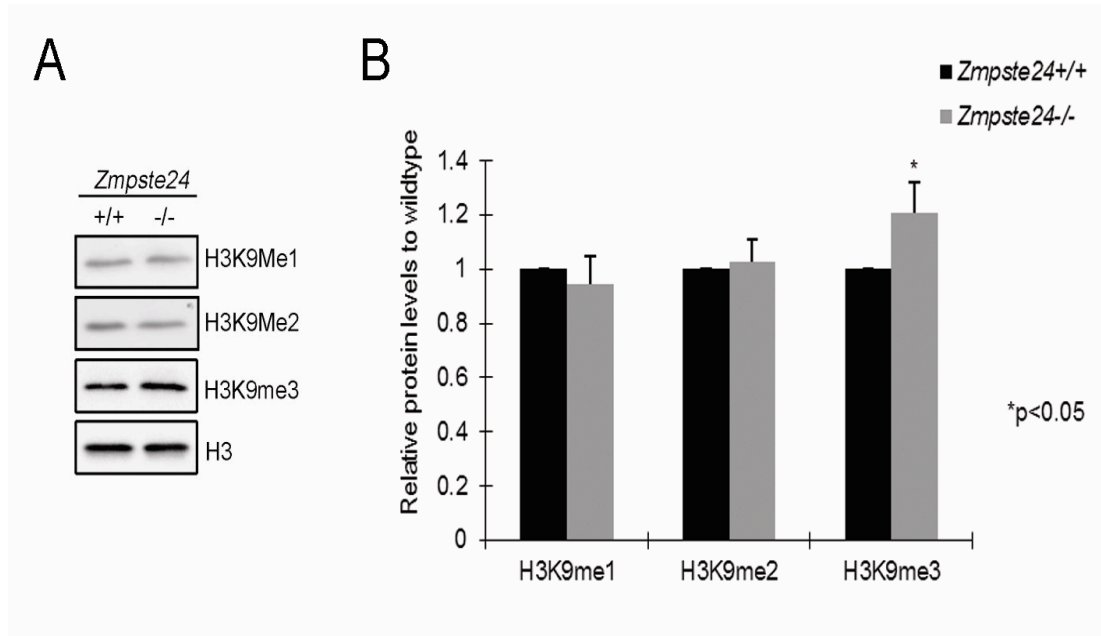

**Figure S1. Histone H3K9 methylation profile in *Zmpste24*<sup>-/-</sup> MEFs.**

(A) Representative immunoblots showing H3K9me1, H3K9me2 and H3K9me3 levels in *Zmpste24*<sup>-/-</sup> MEFs and wild-type littermate controls at early passage 3. Histone H3 is internal control. (B) Relative levels of H3K9 methylation in *Zmpste24*<sup>-/-</sup> MEFs normalized to H3. Data, mean  $\pm$  s.e.m., represent three independently derived lines of MEFs in separate experiments. \* $P < 0.05$ , \*\* $P < 0.01$ , two tailed student's *t* test.

## Figure S2

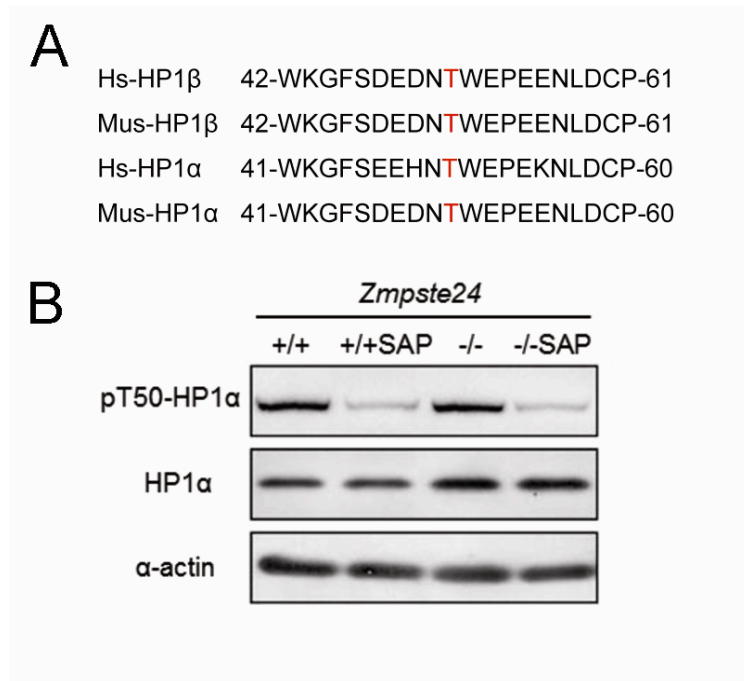

**Figure S2. Amino acid sequence surrounding H3K9me3 binding site of HP1 $\alpha$  and anti HP1 $\alpha$  T50P antibody specificity**

(A) Sequence alignment of conserved residues surrounding Thr51 of HP1 $\beta$  and Thr50 of HP1 $\alpha$  in human and mouse. (B) Representative immunoblots showing levels of pT50-HP1 $\alpha$  and HP1 $\alpha$  in *Zmpste24*<sup>-/-</sup> MEFs and wild-type controls treated with Shrimp Alkaline Phosphatase (SAP).

## Figure S3

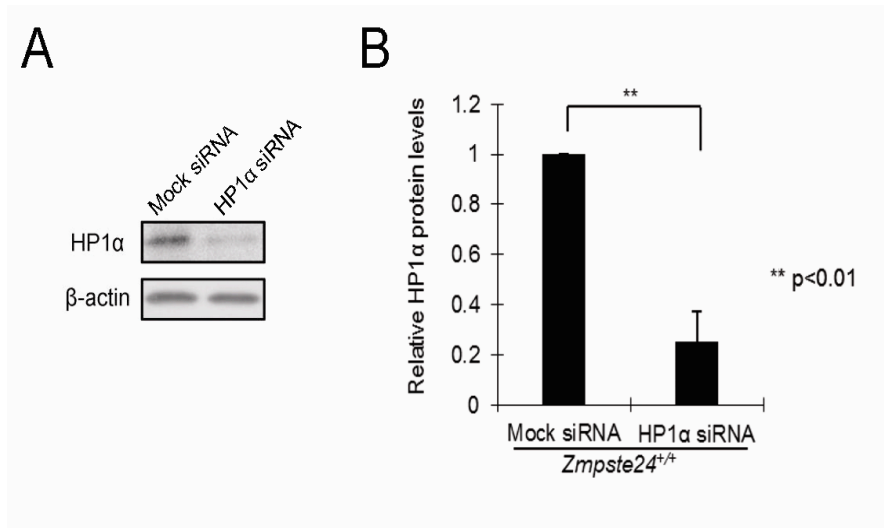

**Figure S3. Knocking down HP1α in wild-type control MEFs.**

(A) Representative immunoblot showing HP1α protein level in cells treated with HP1α siRNA. (B) Quantification of A. Data, mean ± s.e.m. represent three independently derived lines of MEFs in separate experiments. \* $P < 0.05$ , \*\* $P < 0.01$ , two tailed student's  $t$  test.
